# Supplementary material
Source: publisher figshare collection journal article supplement (https://frontiersin.figshare.com/ndownloader/files/14566268)
Supplement: Supplementary file [file 14566268]

## Supplementary Material

### Agrobacterium-mediated transformation of Russian commercial plum cv. ‘Startovaya’ (*Prunus domestica* L.) with virus-derived hairpin RNA construct confers durable resistance to PPV infection in mature plants

Tatiana Sidorova\*, Roman Mikhailov, Alexander Pushin, Dmitry Miroshnichenko, Sergey Dolgov

\* Correspondence: Corresponding Author: sidorovat@rambler.ru

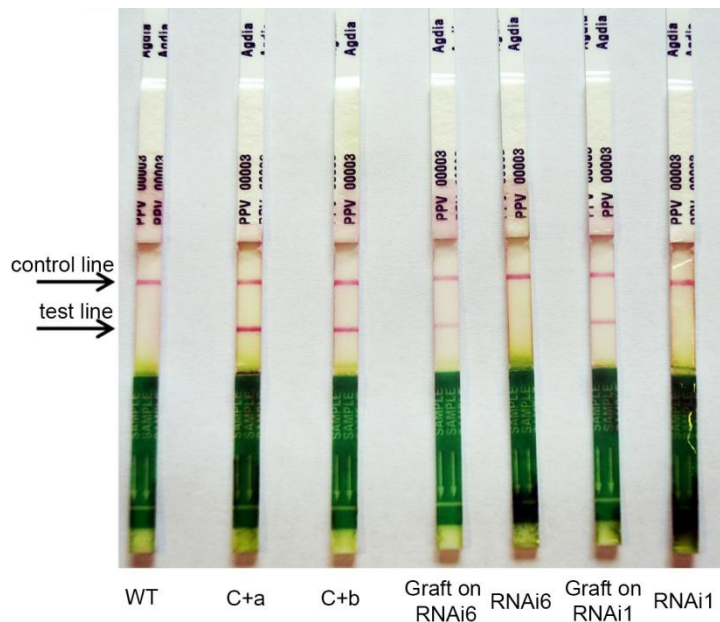

**Supplementary Figure 1.** Immunostrip assays to determine the virus accumulation in the inoculated plum plants. The lower line reveals positive reaction at the protein level (PPV coat protein accumulation). WT – non-transgenic uninfected wild-type plant, C+a and C+b – two individuals of non-transgenic infected by grafting wild-type trees, RNAi1 and RNAi6 – independent transgenic events inoculated with a virus; grafts on RNAi1 and RNAi6 – branches developed on host transgenic trees from grafted infected buds. The test is carried out using the leaf extracts after 5 years of the inoculation.
